# Supplementary material for: Enhanced Survival with Implantable Scaffolds That Capture Metastatic Breast Cancer Cells In Vivo
Source: Oxford University Press journal article supplement (doi:10.1158/0008-5472.can-15-2106), 2016-09-15
Supplement: 00085472can152106-sup-153443_1_supp_0_f9wffq.docx [file 00085472can152106-sup-153443_1_supp_0_f9wffq.docx]

**Table S2:** Sacrifice end points observed in the post-surgical model in the mock and scaffold groups with resection performed at day 10 without Gr-1 depletion.

| Reason for Sacrifice | Mock Group | Scaffold Group |
| --- | --- | --- |
| Hunched posture, bad grooming, and lethargy | 2/7 | 1/7 |
| Labored breathing | 3/7 |  |
| Hind limb paralysis# | 1/7 | 1/7 |
| Fore limb paralysis# |  | 1/7 |
| Cause unknown – mice found dead in cage | 1/7 | 1/7 |
| Experiment terminated – mice were healthy, no signs of disease observed | -- | 3/7 |

#mice with paralysis also showed bad grooming.
