# Supplementary material for: Enhanced Survival with Implantable Scaffolds That Capture Metastatic Breast Cancer Cells In Vivo
Source: Oxford University Press journal article supplement (doi:10.1158/0008-5472.can-15-2106), 2016-09-15
Supplement: 00085472can152106-sup-153443_1_supp_0_h9whhc.doc [file 00085472can152106-sup-153443_1_supp_0_h9whhc.doc]

**SUPPLEMENTARY MATERIALS AND METHODS**

**Scaffold Characterization**

Mechanical testing of scaffolds was performed on a Sintech Instron 20/G (Instron Corp, Norwood MA) at a crosshead rate of 1 mm/min with a 200 g load cell. Samples were compressed to 50% strain and the Young’s Modulus was calculated as determined by TestWorks 4 (MTS Systems Corp, Eden Prairie, MN) software. For examining scaffold micro-architecture, scaffolds were coated with 15 nm gold and imaged using a scanning electron microscope (Hitachi S4800-II cFEG SEM; Hitachi High-Technologies) at an accelerating voltage of 2 kV.  Scaffold porosity was calculated as: 1 – (ρ/ρ*); where ρ is the density of the polymer and ρ* is the apparent density of the scaffold (scaffold weight/scaffold volume). Pore volume was calculated as: scaffold volume × porosity.

**Flow Cytometry**

# Mice were euthanized at indicated times and the retrieved scaffolds and organs were washed in Hank’s Balanced Salt Solution (Life Technologies). Samples were minced using micro scissors in Liberase TL or TM (0.38 mg/mL) (Roche) and placed at 37 ºC for 20 min. Following this, 0.5M EDTA (Life Technologies) was added and cells were retrieved from tissues or scaffolds by straining through a 70 µm filter in FACS buffer [PBS (Life Technologies) with 0.5% Bovine Serum Albumin (Sigma Aldrich) and 2 mM EDTA]. For analysis of tumor cells (tdTomato+ cells), individual scaffold or organ samples were suspended in FACS buffer and analyzed using a BD LSR Fortessa flow cytometer (BD Biosciences). The detection sensitivity for cancer cells via flow cytometry was 0.002% (i.e., 5 cancer cells in 250,000 total cells) (1). For analysis of various leukocyte populations, individual scaffold samples were split equally for analyzing innate and adaptive cells. In each set, cells were blocked using anti-CD16/32 (1:50, clone 93, eBioscience) and stained using LIVE/DEAD® Fixable Blue Dead Cell Stain Kit (1:200, Life Technologies). In the first set, cells were stained with Alexa Fluor® 700 anti-CD45 (1:125, clone 30-F11, Biolegend), V500 anti-CD11b (1:100, clone M1/70, BD Biosciences), FITC anti-Ly6C (1:100, clone HK.14, Biolegend), PE-Cy7 anti-F4/80 (1:80, clone BM8, Biolegend), APC anti-CD11c (1:80, clone N418, Biolegend), and Pacific Blue™ anti- Ly-6G/Ly-6C (Gr-1) (1:70, clone RB6-8C5, Biolegend). In the second set, cells were stained with Alexa Fluor® 700 anti-CD45 (1:125, clone 30-F11, Biolegend), V500 anti-CD4 (1:100, clone RM4-5, Biolegend), Pacific Blue™ anti-CD19 (1:100, clone 6D5, Biolegend), FITC anti-CD8 (1:25, clone 53-6.7, Biolegend), and PE-Cy7 anti-CD49b (1:30, clone DX5, Biolegend). Samples were then analyzed using a BD LSR Fortessa flow cytometer (BD Biosciences). Single color controls were used to set the gating scheme for analysis of leukocyte populations as described previously (1).

**ISOCT imaging and analysis**

Briefly, a spectral domain OCT system with illumination wavelength from 650-800 nm was used to measure backscattering intensity from each 3-D resolution voxel having dimensions 8 × 8 × 4 μm. From the backscatter intensity spectrum, the refractive index correlation function shape factor, *D* was calculated (2). For label-free imaging of PCL scaffolds *in situ*, mice were euthanized at day 5 post tumor inoculation. An incision was made to expose the surface of implanted PCL scaffolds to the scanning OCT laser and two 2 × 2 mm scans were obtained per scaffold. To minimize random surface reflections, PBS was added onto the scaffold. To determine mean *D* value from each measurement, lateral regions of each scan free from reflection and excess adiposity were averaged from 8 to 48 μm below the surface of the scanned sample. To generate representative three-dimensional renderings of a scaffold from tumor free and tumor bearing mice, conventional OCT backscatter intensity was mapped in grayscale with a color map overlay of *D* values. The *D* map was processed with a 24 × 24 μm horizontal filter and a 32 μm vertical filter to smoothen the image.

**References**

1. Azarin SM, Yi J, Gower RM, Aguado BA, Sullivan ME, Goodman AG, et al. In vivo capture and label-free detection of early metastatic cells. Nat Commun 2015.

2. Yi J, Backman V. Imaging a full set of optical scattering properties of biological tissue by inverse spectroscopic optical coherence tomography. Opt Lett 2012;37:4443-5.
